# Supplementary material
Source: Springer Nature journal article supplement (https://www.springermedizin.de/resource/supplementary/13012_2013_751_MOESM1_ESM.pdf/9630614)
Supplement: MOESM1 [file 9630614]

# Implementation Leadership Scale (ILS)

Gregory A. Aarons  
[gaarons@ucsd.edu](mailto:gaarons@ucsd.edu)

Mark Ehrhart  
[mehrhart@mail.sdsu.edu](mailto:mehrhart@mail.sdsu.edu)

Lauren Farahnak  
[lfarahnak@ucsd.edu](mailto:lfarahnak@ucsd.edu)

The ILS assesses the degree to which a leader is Proactive, Knowledgeable, Supportive, and Perseverant in regard to evidence-based practice implementation. There are two versions of the ILS, one for staff to report about their supervisor/leader, and another for supervisors/leaders to report about themselves.

## Reference

Aarons, G.A., Ehrhart, M.G., & Farahnak, L.R. (2014). The Implementation Leadership Scale (ILS): Development of a Brief Measure of Unit Level Implementation Leadership. *Implementation Science*.

For information contact Gregory Aarons: [gaarons@ucsd.edu](mailto:gaarons@ucsd.edu)

### Staff Version

Please indicate the extent to which you agree with each statement.

| 0<br>Not at all | 1<br>Slight extent | 2<br>Moderate extent | 3<br>Great extent | 4<br>Very great extent |
|-----------------|--------------------|----------------------|-------------------|------------------------|
|-----------------|--------------------|----------------------|-------------------|------------------------|

**Proactive**

- 1. [Name of Supervisor] has developed a plan to facilitate implementation of evidence-based practice ..... 0 1 2 3 4
- 2. [Name of Supervisor] has removed obstacles to the implementation of evidence-based practice ..... 0 1 2 3 4
- 3. [Name of Supervisor] has established clear department standards for the implementation of evidence-based practice ..... 0 1 2 3 4

**Knowledgeable**

- 4. [Name of Supervisor] is knowledgeable about evidence-based practice ..... 0 1 2 3 4
- 5. [Name of Supervisor] is able to answer my questions about evidence-based practice..... 0 1 2 3 4
- 6. [Name of Supervisor] knows what he or she is talking about when it comes to evidence-based practice ..... 0 1 2 3 4

**Supportive**

- 7. [Name of Supervisor] recognizes and appreciates employee efforts toward successful implementation of evidence-based practice ..... 0 1 2 3 4
- 8. [Name of Supervisor] supports employee efforts to learn more about evidence-based practice ..... 0 1 2 3 4
- 9. [Name of Supervisor] supports employee efforts to use evidence-based practice ..... 0 1 2 3 4

**Perseverant**

- 10. [Name of Supervisor] perseveres through the ups and downs of implementing evidence-based practice ..... 0 1 2 3 4
- 11. [Name of Supervisor] carries on through the challenges of implementing evidence-based practice ..... 0 1 2 3 4
- 12. [Name of Supervisor] reacts to critical issues regarding the implementation of evidence-based practice by openly and effectively addressing the problem(s) ..... 0 1 2 3 4

## Supervisor Version

Please indicate the extent to which you agree with each statement.

| 0<br>Not at all                                                                                                                                  | 1<br>Slight extent | 2<br>Moderate extent | 3<br>Great extent | 4<br>Very great extent |
|--------------------------------------------------------------------------------------------------------------------------------------------------|--------------------|----------------------|-------------------|------------------------|
| <b>Proactive</b>                                                                                                                                 |                    |                      |                   |                        |
| 1. I have developed a plan to facilitate implementation of evidence-based practice.....                                                          |                    |                      |                   |                        |
| 0                                                                                                                                                | 1                  | 2                    | 3                 | 4                      |
| 2. I have removed obstacles to the implementation of evidence-based practice .....                                                               |                    |                      |                   |                        |
| 0                                                                                                                                                | 1                  | 2                    | 3                 | 4                      |
| 3. I have established clear department standards for the implementation of evidence-based practice .....                                         |                    |                      |                   |                        |
| 0                                                                                                                                                | 1                  | 2                    | 3                 | 4                      |
| <b>Knowledgeable</b>                                                                                                                             |                    |                      |                   |                        |
| 4. I am knowledgeable about evidence-based practice .....                                                                                        |                    |                      |                   |                        |
| 0                                                                                                                                                | 1                  | 2                    | 3                 | 4                      |
| 5. I am able to answer staff's questions about evidence-based practice .....                                                                     |                    |                      |                   |                        |
| 0                                                                                                                                                | 1                  | 2                    | 3                 | 4                      |
| 6. I know what I am talking about when it comes to evidence-based practice .....                                                                 |                    |                      |                   |                        |
| 0                                                                                                                                                | 1                  | 2                    | 3                 | 4                      |
| <b>Supportive</b>                                                                                                                                |                    |                      |                   |                        |
| 7. I recognize and appreciate employee efforts toward successful implementation of evidence-based practice.....                                  |                    |                      |                   |                        |
| 0                                                                                                                                                | 1                  | 2                    | 3                 | 4                      |
| 8. I support employee efforts to learn more about evidence-based practice .....                                                                  |                    |                      |                   |                        |
| 0                                                                                                                                                | 1                  | 2                    | 3                 | 4                      |
| 9. I support employee efforts to use evidence-based practice .....                                                                               |                    |                      |                   |                        |
| 0                                                                                                                                                | 1                  | 2                    | 3                 | 4                      |
| <b>Perseverant</b>                                                                                                                               |                    |                      |                   |                        |
| 10. I persevere through the ups and downs of implementing evidence-based practice .....                                                          |                    |                      |                   |                        |
| 0                                                                                                                                                | 1                  | 2                    | 3                 | 4                      |
| 11. I carry on through the challenges of implementing evidence-based practice.....                                                               |                    |                      |                   |                        |
| 0                                                                                                                                                | 1                  | 2                    | 3                 | 4                      |
| 12. I react to critical issues regarding the implementation of evidence-based practice by openly and effectively addressing the problem(s) ..... |                    |                      |                   |                        |
| 0                                                                                                                                                | 1                  | 2                    | 3                 | 4                      |
